# Supplementary material
Source: PubMed Central journal article supplement (PMC4106972)

A

Donor major salivary glands after H2BGFP cells transplant

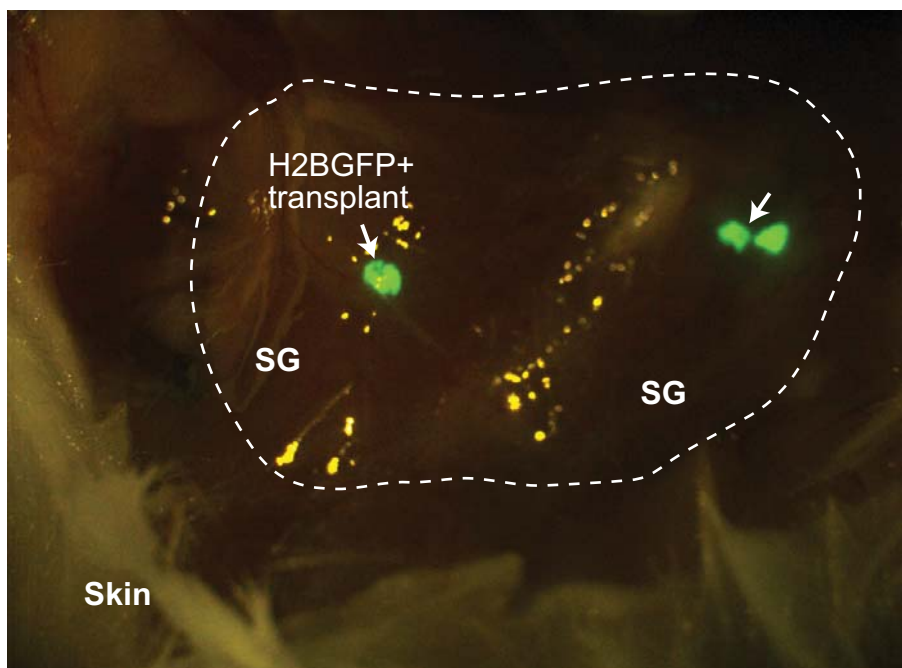

B

Ki67  
H2BGFP

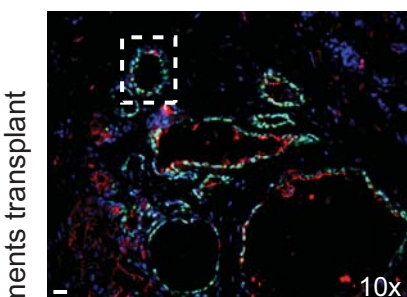

tissue fragments transplant

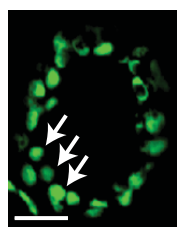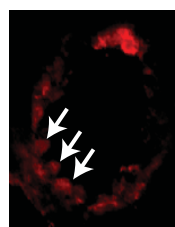

C

Ki67  
H2BGFP

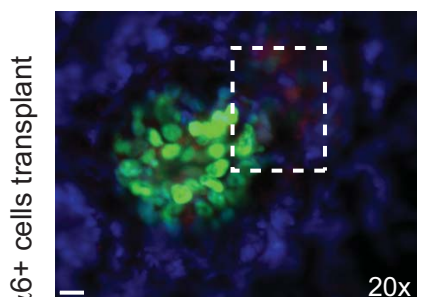

GFP+/CD44+/α6+ cells transplant

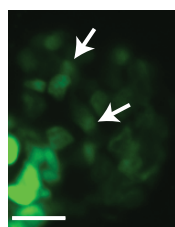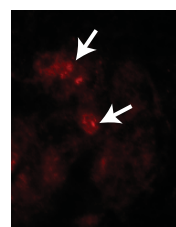

Supplement: NIHMS583039-supplement-Supp_Fig_S1-S2.pdf [file NIHMS583039-supplement-Supp_Fig_S1-S2.pdf]
